# Supplementary material
Source: PubMed Central journal article supplement (PMC2825457)
Supplement: supp_M109.065854_jbc.M109.065854-1.pdf [file supp_M109.065854_jbc.M109.065854-1.pdf]

## SUPPLEMENTAL FIGURES

**Fig. S1**

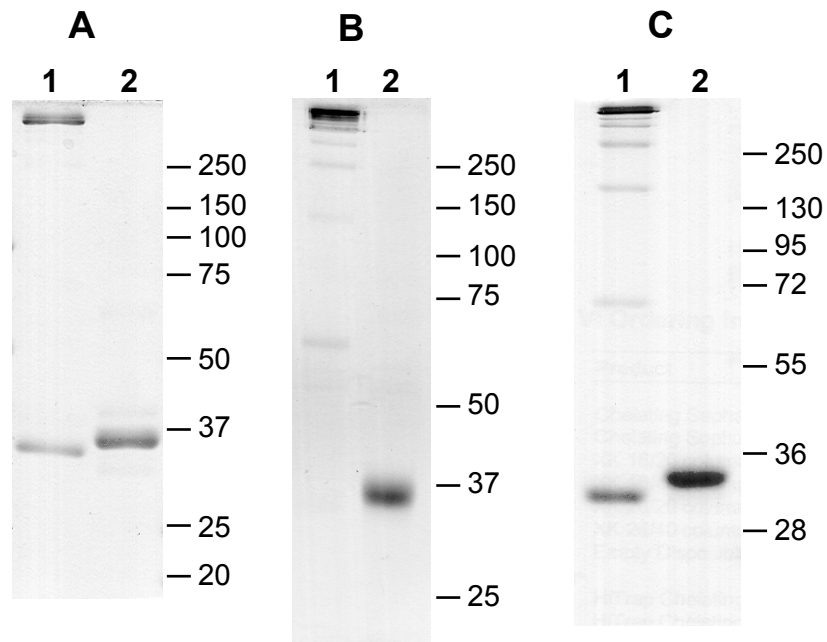

**FIGURE S1. SDS-PAGE analysis of the three human ficolins.** Coomassie blue staining of purified serum L-ficolin (A), recombinant H-ficolin (B) and recombinant M-ficolin (C), unreduced (lanes 1) and reduced (lanes 2). The positions of reduced standard proteins are indicated on the right sides of the gels.

**Fig. S2**

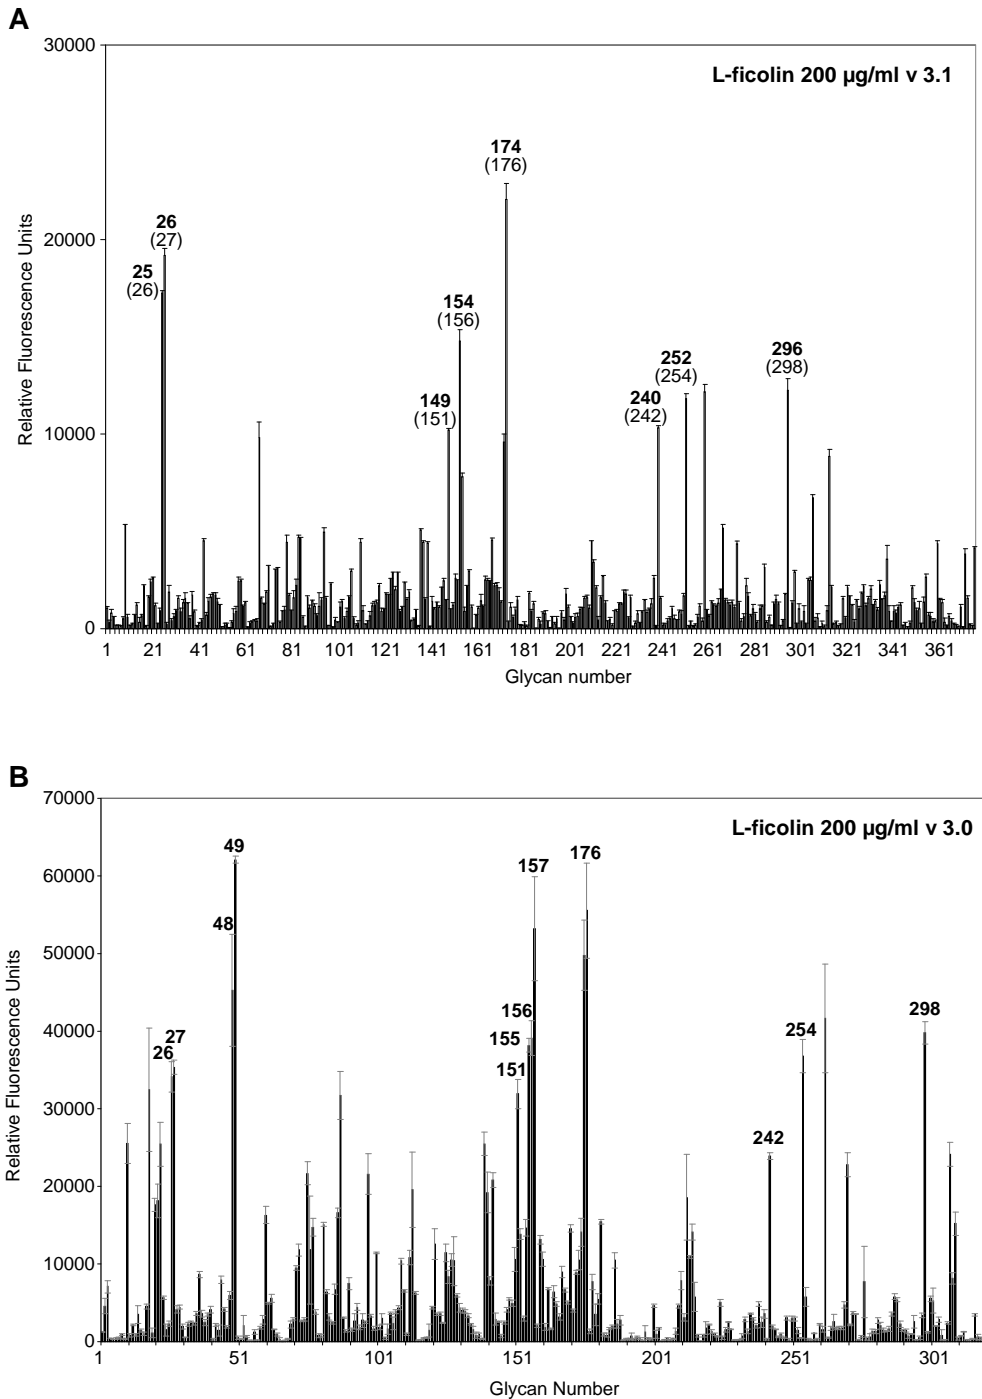

FIGURE S2. Glycan array screening of L-ficolin. Versions v3.1 (A) and v3.0 (B) of the printed array of the Consortium for Functional Glycomics were probed with L-ficolin (200  $\mu\text{g/ml}$ ). The glycan numbers of array version 3.0 are indicated in parentheses in (A).

**Fig. S3**

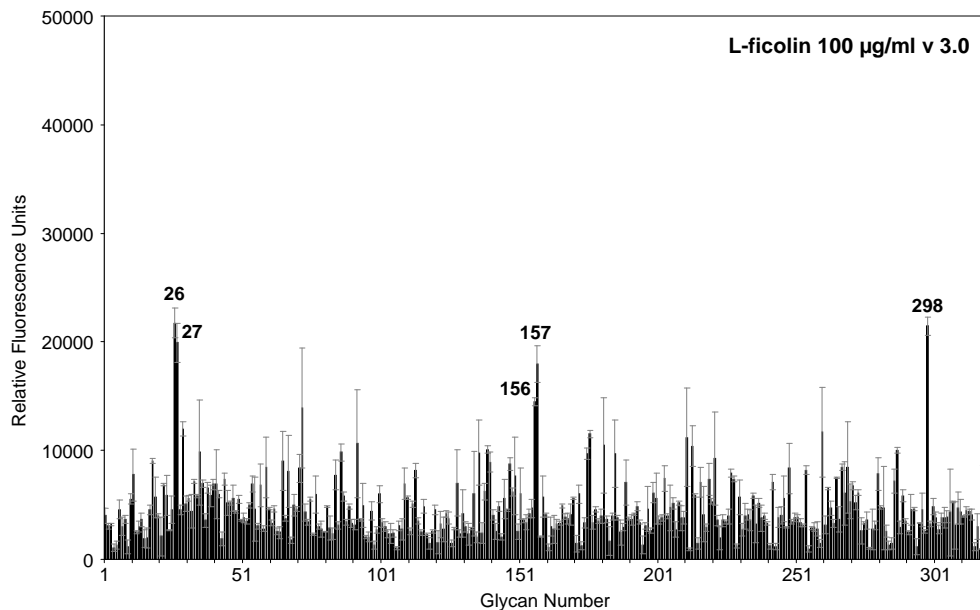

FIGURE S3. Glycan array screening of L-ficolin. Version v3.0 of the printed array of the Consortium for Functional Glycomics was probed with L- ficolin (100 µg/ml).

**Fig. S4**

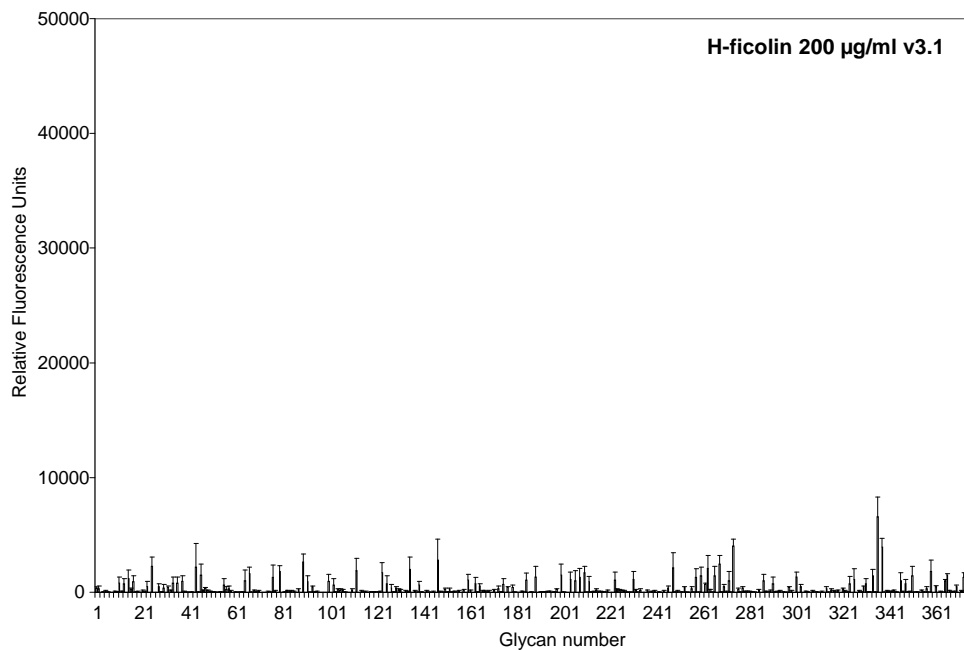

FIGURE S4. Glycan array screening of H-ficolin. Version v3.1 of the printed array of the Consortium for Functional Glycomics was probed with H- ficolin (200 µg/ml).

**Fig. S5**

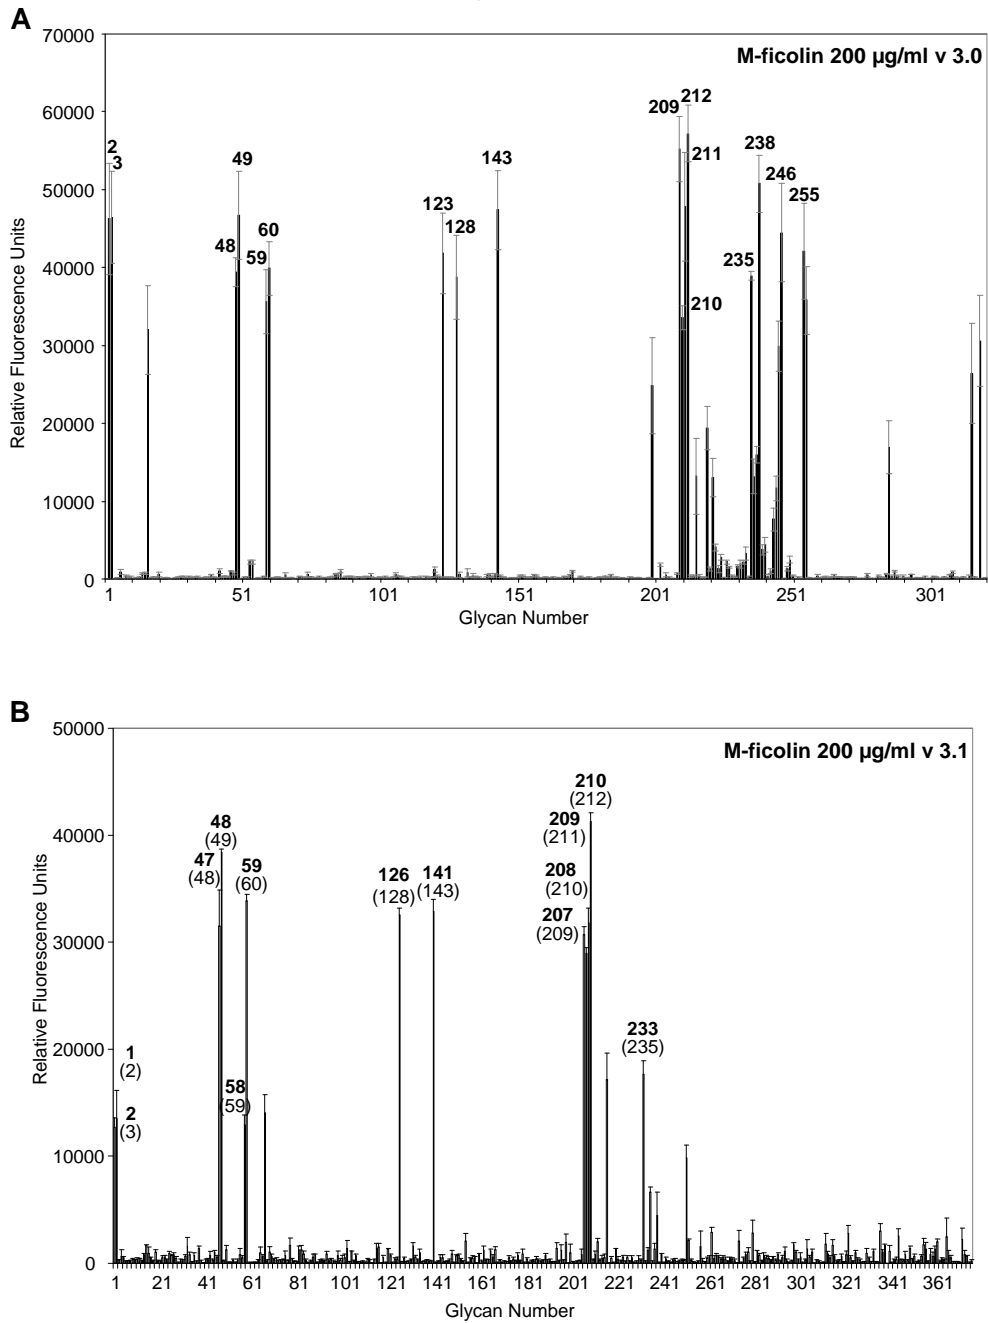

FIGURE S5. Glycan array screening of M-ficolin. Versions v3.0 (A) and v3.1 (B) of the printed array of the Consortium for Functional Glycomics were probed with M-ficolin (200 µg/ml). The glycan numbers of array version 3.0 are indicated in parentheses in (B).

**Fig. S6**

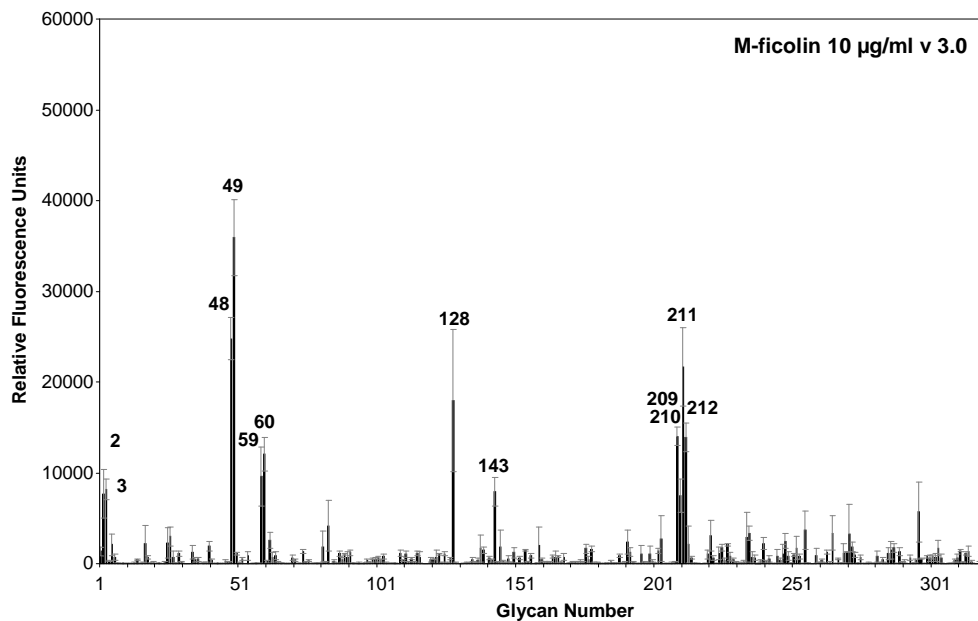

FIGURE S6. Glycan array screening of M-ficolin. Version v3.0 of the printed array of the Consortium for Functional Glycomics was probed with M- ficolin (10 µg/ml).

**Fig.S7**

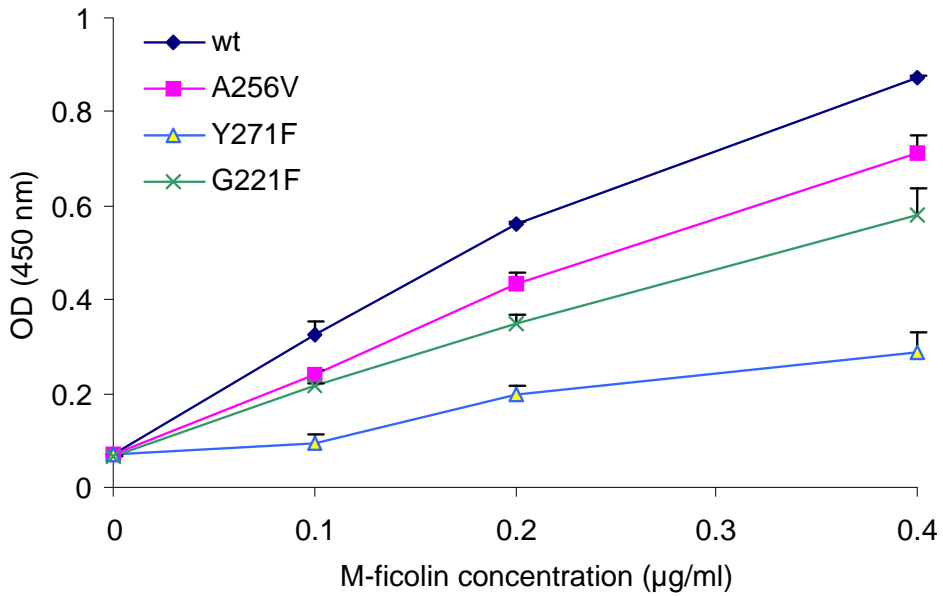

FIGURE S7. Binding of the M-ficolin variants to acetylated BSA. Acetylated BSA (0.5 µg) was coated in microtiter wells and incubated with various amounts of M-ficolin. The amount of bound protein was measured by reaction with a polyclonal rabbit anti-L-ficolin antibody that crossreacts with M-ficolin, as described under Experimental Procedures. Results are presented as means  $\pm$  SD of three independent experiments. Similar results were obtained when the M-ficolin variants were incubated in the presence of ficolin-deficient serum (1:25 dilution).

**Fig. S8**

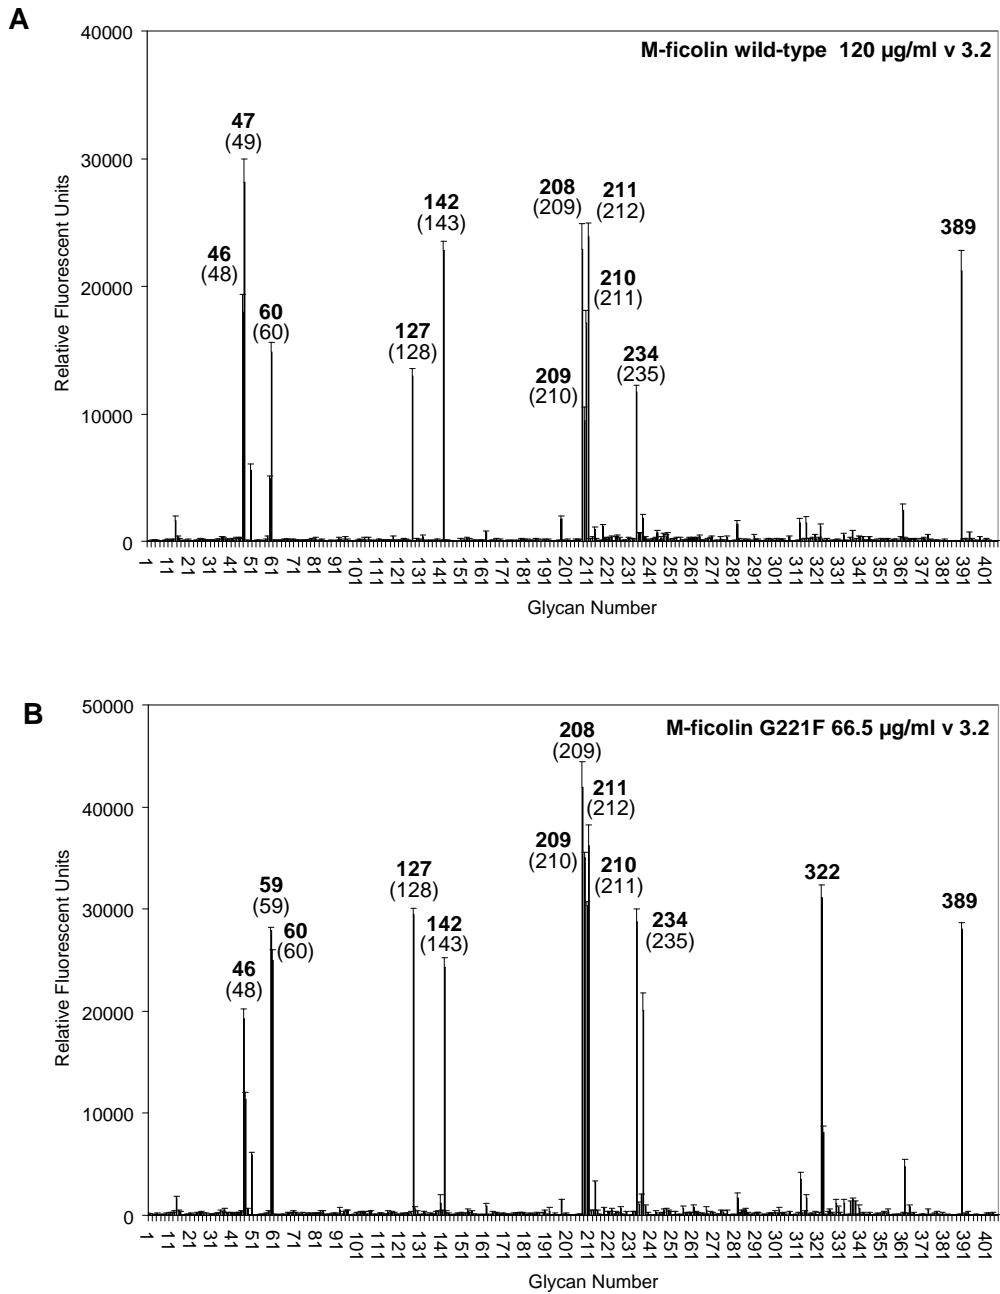

FIGURE S8. Glycan array screening of the M-ficolin variants. Version v3.2 of the printed array of the Consortium for Functional Glycomics was probed with (A) wild-type M-ficolin (120 µg/ml) and (B) the G221F mutant (66.5 µg/ml). The glycan numbers of array version 3.0 are indicated in parentheses.

**Fig. S8 (continue)**

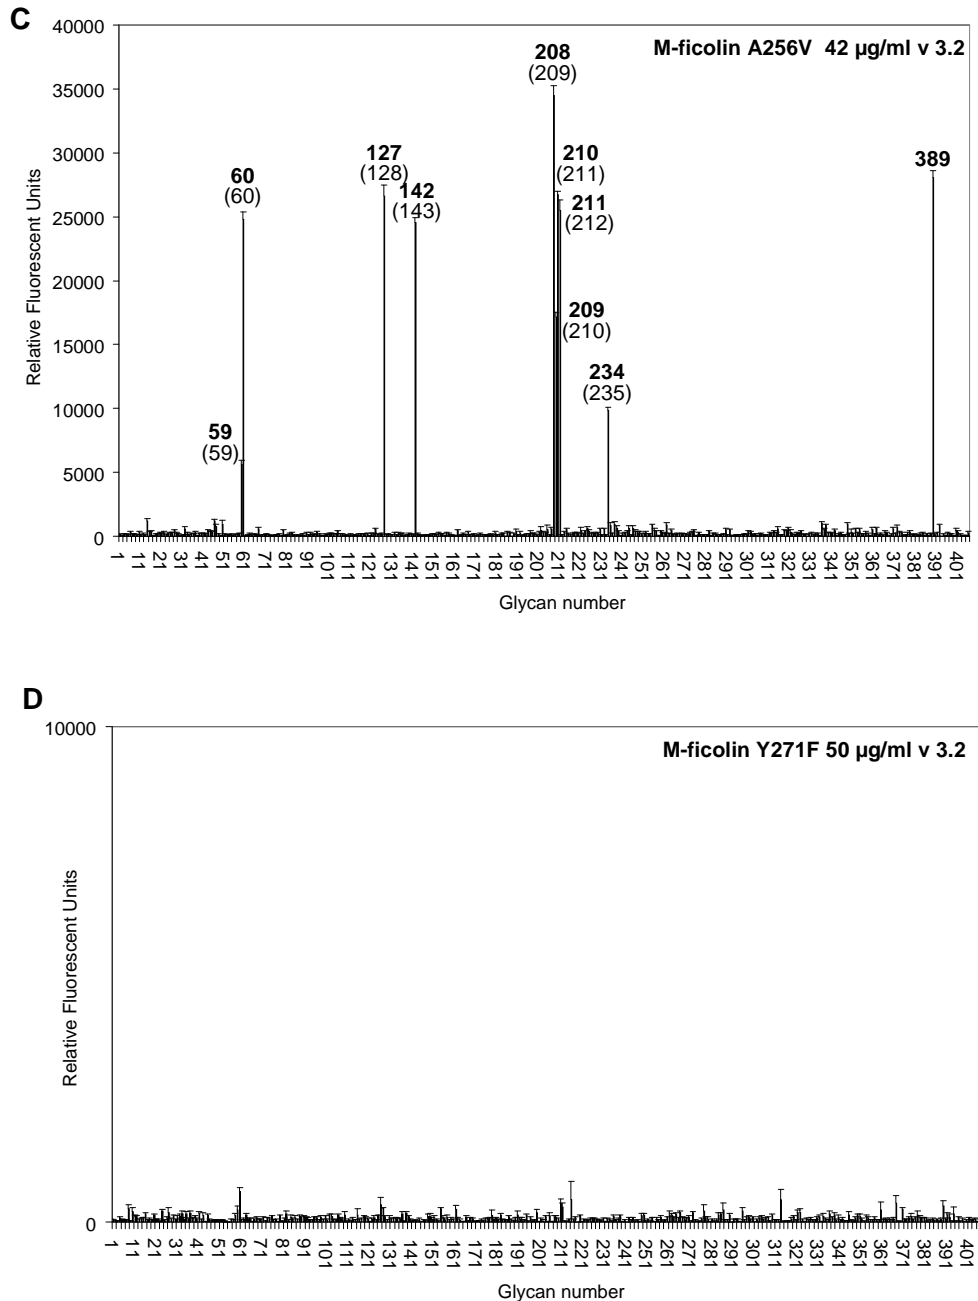

FIGURE S8. Glycan array screening of the M-ficolin variants. Version v3.2 of the printed array of the Consortium for Functional Glycomics was probed with (C) the A256V mutant (42 µg/ml) and (D) the Y271F mutant (50 µg/ml). The glycan numbers of array version 3.0 are indicated in parentheses.



**Fig. S9**

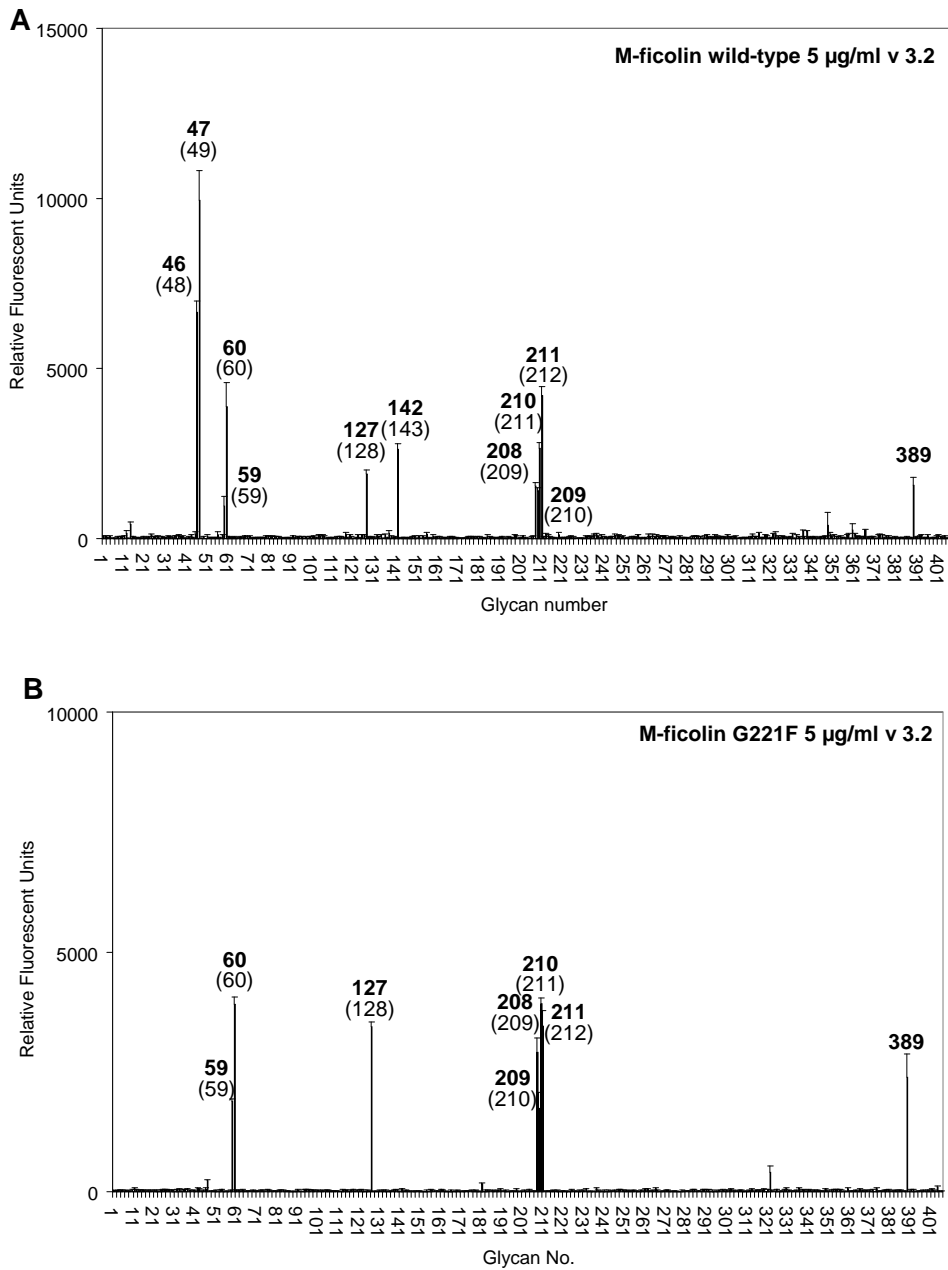

**FIGURE S9.** Glycan array screening of the M-ficolin variants. Version v3.2 of the printed array of the Consortium for Functional Glycomics was probed with (A) wild-type M-ficolin and (B) the G221F mutant (both at 5  $\mu\text{g/ml}$ ). The glycan numbers of array version 3.0 are indicated in parentheses.

**Fig. S9 (continue)**

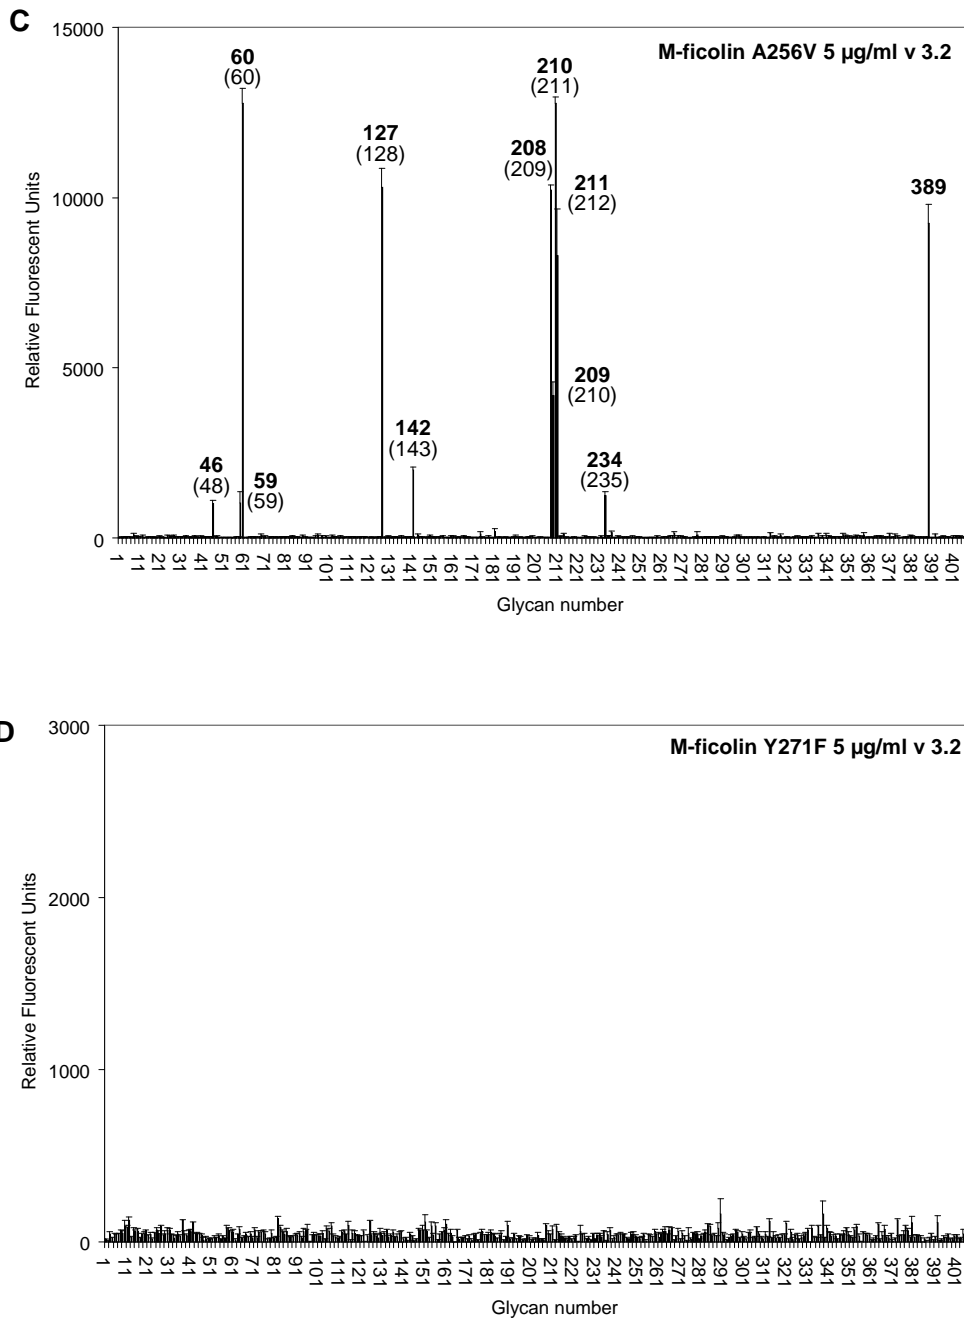

FIGURE S9. Glycan array screening of the M-ficolin variants. Version v3.2 of the printed array of the Consortium for Functional Glycomics was probed with the A256V (C) and the Y271F (D) mutants (5  $\mu\text{g/ml}$ ). The glycan numbers of array version 3.0 are indicated in parentheses.

**Fig. S10**

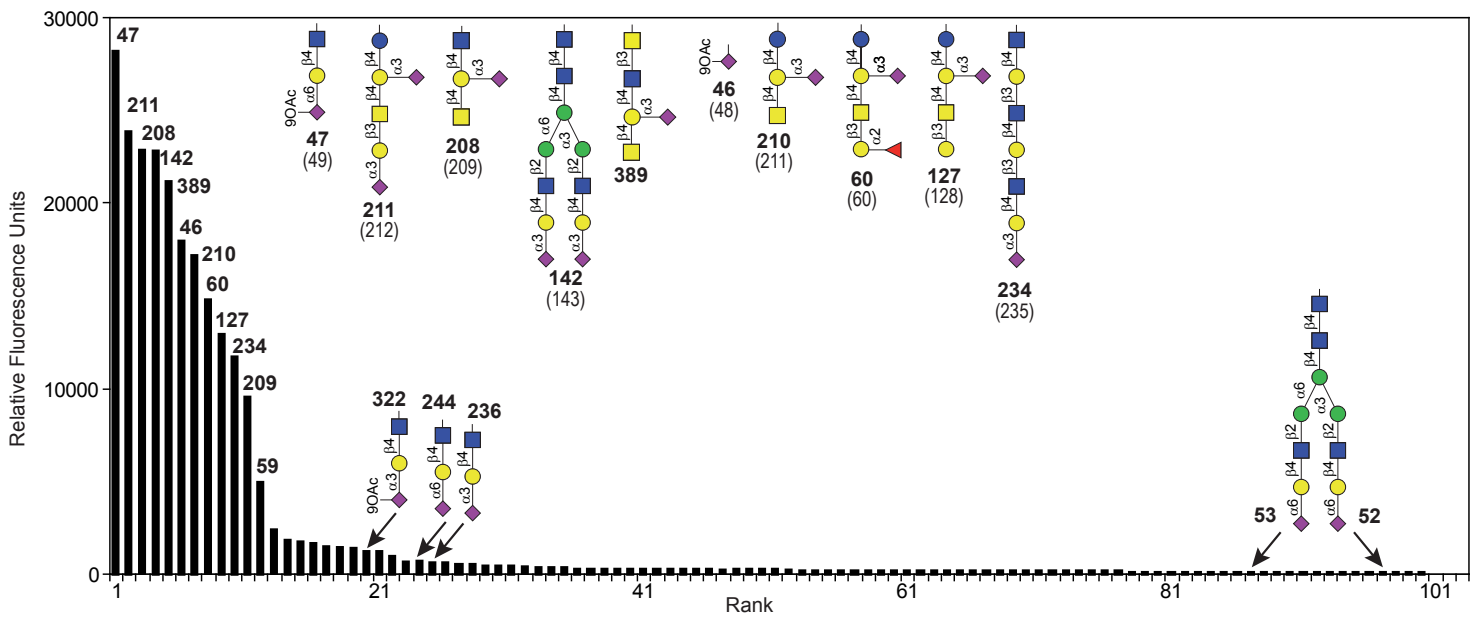

FIGURE S10. Sialic acid containing ligand binding by M-ficolin. Glycan array v3.2 data for M-ficolin (120  $\mu\text{g}/\text{ml}$ ) are plotted in rank order of ligand binding. The glycan numbers of array version 3.0 are indicated in parentheses.
