# Supplementary material
Source: PubMed Central journal article supplement (PMC2825457)
Supplement: supp_M109.065854_jbc.M109.065854-2.pdf [file supp_M109.065854_jbc.M109.065854-2.pdf]

## SUPPLEMENTAL TABLES

### TABLE S1

#### Crystallographic data collection and refinement statistics

|                                                         |                       |
|---------------------------------------------------------|-----------------------|
| <b>PDB code</b>                                         | 2WNP                  |
| <b>Data collection</b>                                  |                       |
| ESRF beamline                                           | BM30                  |
| Resolution shell (Å)                                    | 50-1.21 (1.241.21)    |
| Observed reflections                                    | 531,861 (1,245)       |
| Unique reflections                                      | 54,807 (410)          |
| Redundancy                                              | 9.7 (3)               |
| Completeness (%)                                        | 72 (7.3)              |
| I/SigI                                                  | 28.27 (2.37)          |
| Rsym (%)                                                | 4.4 (49)              |
| <b>Data refinement</b>                                  |                       |
| Resolution high/low Å                                   | 20-1.21 (1.2571.214)  |
| <i>R</i> <sub>work</sub> / <i>R</i> <sub>free</sub> (%) | 17.8/19.1 (25.5/27.2) |
| R.m.s.d. bond/angle (Å/°)                               | 0.007/1.108           |

Table S2

M-ficolin wild-type 120 µg/ml v 3.2

| Chart # | Masterlist Name                                                                                                | RFU   |
|---------|----------------------------------------------------------------------------------------------------------------|-------|
| 47      | <b>Neu5Ac(9Ac)</b> a2-6Galb1-4GlcNAcb-Sp8                                                                      | 28171 |
| 211     | <b>Neu5Aca2-3(Neu5Aca2-3Galb1-3GalNAcb1-4)Galb1-4Glc-Sp0</b>                                                   | 23878 |
| 208     | <b>Neu5Aca2-3(GalNAcb1-4)Galb1-4GlcNAcb-Sp0</b>                                                                | 22857 |
| 142     | <b>Neu5Aca2-3Galb1-4GlcNAcb1-2Mana1-3(Neu5Aca2-3Galb1-4GlcNAcb1-2Mana1-6)Manb1-4GlcNAcb1-4GlcNAcb-Sp12</b>     | 22846 |
| 389     | <b>Neu5Aca2-3(GalNAcb1-4)Galb1-4GlcNAcb1-3GalNAca-Sp14</b>                                                     | 21171 |
| 46      | <b>Neu5Ac(9Ac)</b> a-Sp8                                                                                       | 17976 |
| 210     | <b>Neu5Aca2-3(GalNAcb1-4)Galb1-4Glc-Sp0</b>                                                                    | 17139 |
| 60      | Fuca1-2Galb1-3GalNAcb1-4( <b>Neu5Aca2-3</b> )Galb1-4Glc-Sp9                                                    | 14828 |
| 127     | Galb1-3GalNAcb1-4( <b>Neu5Aca2-3</b> )Galb1-4Glc-Sp0                                                           | 12961 |
| 234     | <b>Neu5Aca2-3Galb1-4GlcNAcb1-3Galb1-4GlcNAcb1-3Galb1-4GlcNAcb-Sp0</b>                                          | 11706 |
| 209     | <b>Neu5Aca2-3(GalNAcb1-4)Galb1-4GlcNAcb-Sp8</b>                                                                | 9497  |
| 59      | Fuca1-2Galb1-3GalNAcb1-4( <b>Neu5Aca2-3</b> )Galb1-4Glc-Sp0                                                    | 4940  |
| 361     | <b>Neu5Aca2-6GlcNAcb1-4GlcNAc-Sp21</b>                                                                         | 2444  |
| 237     | <b>Neu5Aca2-3Galb1-4GlcNAcb1-3Galb1-4GlcNAcb-Sp0</b>                                                           | 1818  |
| 198     | <b>Neu5Aca2-6Galb1-4GlcNAcb1-2Mana1-3(Neu5Aca2-3Galb1-4GlcNAcb1-2Mana1-6)Manb1-4GlcNAcb1-4GlcNAcb-Sp12</b>     | 1763  |
| 14      | <b>Neu5Acb-Sp8</b>                                                                                             | 1650  |
| 315     | <b>Neu5Aca2-3Galb1-4GlcNAcb1-2Mana1-3(Neu5Aca2-6Galb1-4GlcNAcb1-2Mana1-6)Manb1-4GlcNAcb1-4GlcNAcb-Sp12</b>     | 1441  |
| 312     | <b>Neu5Aca2-3Galb1-3(Neu5Aca2-3Galb1-4GlcNAcb1-6)GalNAca-Sp14</b>                                              | 1436  |
| 282     | <b>Neu5Aca2-3Galb1-4GlcNAcb1-3Galb1-3GlcNAcb-Sp0</b>                                                           | 1399  |
| 322     | <b>Neu5Ac(9Ac)</b> a2-3Galb1-4GlcNAcb-Sp0                                                                      | 1201  |
| 218     | <b>Neu5Aca2-3Galb1-3(Neu5Aca2-3Galb1-4)GlcNAcb-Sp8</b>                                                         | 1178  |
| 214     | <b>Neu5Aca2-3GalNAcb1-4GlcNAcb-Sp0</b>                                                                         | 924   |
| 393     | <b>Neu5Aca2-3Galb1-3GlcNAcb1-2Mana1-3(Neu5Aca2-3Galb1-3GlcNAcb1-2Mana1-6)Manb1-4GlcNAcb1-4GlcNAc-Sp19</b>      | 695   |
| 244     | <b>Neu5Aca2-6Galb1-4GlcNAcb-Sp8</b>                                                                            | 684   |
| 236     | <b>Neu5Aca2-3Galb1-4GlcNAcb-Sp8</b>                                                                            | 626   |
| 235     | <b>Neu5Aca2-3Galb1-4GlcNAcb-Sp0</b>                                                                            | 614   |
| 249     | <b>Neu5Aca2-6Galb-Sp8</b>                                                                                      | 555   |
| 247     | <b>Neu5Aca2-6Galb1-4Glc-Sp0</b>                                                                                | 511   |
| 373     | <b>Neu5Aca2-3Galb1-4(Fuca1-3)GlcNAcb1-3GalNAca-Sp14</b>                                                        | 476   |
| 290     | Galb1-3( <b>Neu5Aca2-3Galb1-4(Fuca1-3)GlcNAcb1-6)GalNAca-Sp14</b>                                              | 433   |
| 225     | <b>Neu5Aca2-3Galb1-3GlcNAcb-Sp8</b>                                                                            | 409   |
| 248     | <b>Neu5Aca2-6Galb1-4Glc-Sp8</b>                                                                                | 402   |
| 238     | <b>Neu5Aca2-3Galb1-4Glc-Sp0</b>                                                                                | 333   |
| 222     | <b>Neu5Aca2-3Galb1-3GalNAcb1-3Gala1-4Galb1-4Glc-Sp0</b>                                                        | 329   |
| 224     | <b>Neu5Aca2-3Galb1-3GlcNAcb-Sp0</b>                                                                            | 309   |
| 213     | <b>Neu5Aca2-3GalNAca-Sp8</b>                                                                                   | 299   |
| 342     | <b>Neu5Aca2-6Galb1-4GlcNAcb1-2Mana1-3Manb1-4GlcNAcb1-4GlcNAc-Sp12</b>                                          | 296   |
| 340     | <b>Neu5Aca2-6Galb1-4GlcNAcb1-2Mana1-3(Mana1-6)Manb1-4GlcNAcb1-4GlcNAc-Sp12</b>                                 | 296   |
| 253     | <b>Neu5Acb2-6Galb1-4GlcNAcb-Sp8</b>                                                                            | 287   |
| 341     | <b>Neu5Aca2-6Galb1-4GlcNAcb1-2Mana1-6Manb1-4GlcNAcb1-4GlcNAc-Sp12</b>                                          | 279   |
| 274     | Galb1-3( <b>Neu5Aca2-3Galb1-4GlcNAcb1-6)GalNAca-Sp14</b>                                                       | 277   |
| 362     | <b>Neu5Aca2-6GlcNAcb1-4GlcNAcb1-4GlcNAc-Sp21</b>                                                               | 262   |
| 318     | <b>Neu5Aca2-6Galb1-4GlcNAcb1-2Mana1-3(Neu5Aca2-6Galb1-4GlcNAcb1-2Mana1-6)Manb1-4GlcNAcb1-4GlcNAcb-N(LT)AVL</b> | 260   |
| 226     | <b>Neu5Aca2-3Galb1-4[6OSO3]GlcNAcb-Sp8</b>                                                                     | 259   |
| 243     | <b>Neu5Aca2-6Galb1-4GlcNAcb-Sp0</b>                                                                            | 255   |
| 230     | <b>Neu5Aca2-3Galb1-4(Fuca1-3)GlcNAcb-Sp8</b>                                                                   | 251   |
| 246     | <b>Neu5Aca2-6Galb1-4GlcNAcb1-3Galb1-4GlcNAcb-Sp0</b>                                                           | 248   |
| 232     | <b>Neu5Aca2-3Galb1-4(Fuca1-3)GlcNAcb1-3Galb1-4GlcNAcb-Sp8</b>                                                  | 247   |
| 371     | <b>NeuAca2-3Galb1-4GlcNAcb1-3GalNAc-Sp14</b>                                                                   | 245   |
| 219     | <b>Neu5Aca2-3Galb1-3[6OSO3]GalNAca-Sp8</b>                                                                     | 238   |

Table S2 (Cont)

|     |                                                                                                            |     |
|-----|------------------------------------------------------------------------------------------------------------|-----|
| 221 | <b>Neu5Aca2-3Galb-Sp8</b>                                                                                  | 223 |
| 212 | <b>Neu5Aca2-3(Neu5Aca2-6)GalNAca-Sp8</b>                                                                   | 217 |
| 123 | Galb1-3( <b>Neu5Aca2-6</b> )GlcNAcb1-4Galb1-4Glc-Sp10                                                      | 215 |
| 301 | GlcNAcb1-2Mana1-3( <b>Neu5Aca2-6Galb1-4GlcNAcb1-2Mana1-6</b> )Manb1-4GlcNAcb1-4GlcNAcb-Sp12                | 209 |
| 242 | <b>Neu5Aca2-6Galb1-4[6OSO3]GlcNAcb-Sp8</b>                                                                 | 208 |
| 44  | <b>Neu5Aca2-3[6OSO3]Galb1-4GlcNAcb-Sp8</b>                                                                 | 207 |
| 252 | <b>Neu5Acb2-6GalNAca-Sp8</b>                                                                               | 198 |
| 339 | Mana1-3( <b>Neu5Aca2-6Galb1-4GlcNAcb1-2Mana1-6</b> )Manb1-4GlcNAcb1-4GlcNAc-Sp12                           | 194 |
| 314 | <b>Neu5Aca2-3Galb1-3GalNAca-Sp14</b>                                                                       | 192 |
| 325 | <b>Neu5Aca2-3Galb1-3(Fuca1-4)GlcNAcb1-3Galb1-3(Fuca1-4)GlcNAcb-Sp0</b>                                     | 190 |
| 316 | <b>Neu5Aca2-6Galb1-4GlcNAcb1-2Mana1-3(Galb1-4GlcNAcb1-2Mana1-6)Manb1-4GlcNAcb1-4GlcNAcb-Sp12</b>           | 185 |
| 220 | <b>Neu5Aca2-3Galb1-3(Neu5Aca2-6)GalNAca-Sp8</b>                                                            | 178 |
| 215 | <b>Neu5Aca2-3Galb1-3[6OSO3]GlcNAc-Sp8</b>                                                                  | 177 |
| 205 | <b>Neu5Aca2-8Neu5Aca2-3(GalNAcb1-4)Galb1-4Glc-Sp0</b>                                                      | 175 |
| 317 | <b>Neu5Aca2-6Galb1-4GlcNAcb1-2Mana1-3(GlcNAcb1-2Mana1-6)Manb1-4GlcNAcb1-4GlcNAcb-Sp12</b>                  | 172 |
| 250 | <b>Neu5Aca2-8Neu5Aca-Sp8</b>                                                                               | 169 |
| 13  | <b>Neu5Aca-Sp11</b>                                                                                        | 166 |
| 233 | <b>Neu5Aca2-3Galb1-4GlcNAcb1-3Galb1-4(Fuca1-3)GlcNAc-Sp0</b>                                               | 154 |
| 231 | <b>Neu5Aca2-3Galb1-4(Fuca1-3)GlcNAcb1-3Galb-Sp8</b>                                                        | 153 |
| 207 | <b>Neu5Aca2-3(6-O-Su)Galb1-4(Fuca1-3)GlcNAcb-Sp8</b>                                                       | 151 |
| 239 | <b>Neu5Aca2-3Galb1-4Glc-Sp8</b>                                                                            | 149 |
| 201 | <b>Neu5Aca2-3Galb1-3GalNAca-Sp8</b>                                                                        | 145 |
| 372 | <b>NeuAca2-6Galb1-4GlcNAcb1-3GalNAc-Sp14</b>                                                               | 142 |
| 12  | <b>Neu5Aca-Sp8</b>                                                                                         | 139 |
| 313 | <b>Neu5Aca2-3Galb1-3(Neu5Aca2-6)GalNAca-Sp14</b>                                                           | 136 |
| 323 | <b>Neu5Ac(9Ac)a2-3Galb1-3GlcNAcb-Sp0</b>                                                                   | 135 |
| 320 | Galb1-3( <b>Neu5Aca2-6</b> )GalNAca-Sp14                                                                   | 132 |
| 122 | Galb1-3( <b>Neu5Acb2-6</b> )GalNAca-Sp8                                                                    | 119 |
| 229 | <b>Neu5Aca2-3Galb1-4(Fuca1-3)GlcNAcb-Sp0</b>                                                               | 113 |
| 228 | <b>Neu5Aca2-3Galb1-4(Fuca1-3)GlcNAcb1-3Galb1-4(Fuca1-3)GlcNAcb1-3Galb1-4(Fuca1-3)GlcNAcb-Sp0</b>           | 106 |
| 217 | <b>Neu5Aca2-3Galb1-3(Fuca1-4)GlcNAcb1-3Galb1-4(Fuca1-3)GlcNAcb-Sp0</b>                                     | 105 |
| 331 | <b>(Neu5Aca2-3-Galb1-3)((Neu5Aca2-3-Galb1-4(Fuca1-3))GlcNAcb1-6)GalNAc-Sp14</b>                            | 103 |
| 245 | <b>Neu5Aca2-6Galb1-4GlcNAcb1-3Galb1-4(Fuca1-3)GlcNAcb1-3Galb1-4(Fuca1-3)GlcNAcb-Sp0</b>                    | 100 |
| 241 | <b>Neu5Aca2-6GalNAcb1-4GlcNAcb-Sp0</b>                                                                     | 96  |
| 206 | <b>Neu5Aca2-8Neu5Aca2-8Neu5Aca-Sp8</b>                                                                     | 96  |
| 251 | <b>Neu5Aca2-8Neu5Aca2-3Galb1-4Glc-Sp0</b>                                                                  | 91  |
| 53  | <b>Neu5Aca2-6Galb1-4GlcNAcb1-2Mana1-3(Neu5Aca2-6Galb1-4GlcNAcb1-2Mana1-6)Manb1-4GlcNAcb1-4GlcNAcb-Sp13</b> | 89  |
| 54  | <b>Neu5Aca2-6Galb1-4GlcNAcb1-2Mana1-3(Neu5Aca2-6Galb1-4GlcNAcb1-2Mana1-6)Manb1-4GlcNAcb1-4GlcNAcb-Sp8</b>  | 89  |
| 396 | <b>Neu5Aca2-3Galb1-3GlcNAcb1-3GalNAca-Sp14</b>                                                             | 87  |
| 281 | <b>Neu5Aca2-3Galb1-3GlcNAcb1-3Galb1-3GlcNAcb-Sp0</b>                                                       | 86  |
| 203 | <b>Neu5Aca2-8Neu5Aca2-8Neu5Aca2-3(GalNAcb1-4)Galb1-4Glc-Sp0</b>                                            | 84  |
| 240 | <b>Neu5Aca2-6GalNAca-Sp8</b>                                                                               | 81  |
| 1   | <b>Neu5Aca2-8Neu5Acb-Sp17</b>                                                                              | 75  |
| 121 | Galb1-3( <b>Neu5Aca2-6</b> )GalNAca-Sp8                                                                    | 74  |
| 216 | <b>Neu5Aca2-3Galb1-3(Fuca1-4)GlcNAcb-Sp8</b>                                                               | 71  |
| 227 | <b>Neu5Aca2-3Galb1-4(Fuca1-3)[6OSO3]GlcNAcb-Sp8</b>                                                        | 70  |
| 52  | <b>Neu5Aca2-6Galb1-4GlcNAcb1-2Mana1-3(Neu5Aca2-6Galb1-4GlcNAcb1-2Mana1-6)Manb1-4GlcNAcb1-4GlcNAcb-Sp12</b> | 70  |
| 326 | <b>Neu5Aca2-6Galb1-4GlcNAcb1-3Galb1-4GlcNAcb1-3Galb1-4GlcNAcb-Sp0</b>                                      | 67  |
| 204 | <b>Neu5Aca2-8Neu5Aca2-8Neu5Aca2-3Galb1-4Glc-Sp0</b>                                                        | 55  |
| 324 | <b>Neu5Aca2-6Galb1-4GlcNAcb1-3Galb1-3GlcNAcb-Sp0</b>                                                       | 46  |
| 202 | <b>Neu5Aca2-8Neu5Aca2-8Neu5Aca2-3(GalNAcb1-4)Galb1-4Glc-Sp0</b>                                            | 41  |
| 223 | <b>Neu5Aca2-3Galb1-3GlcNAcb1-3Galb1-4GlcNAcb-Sp0</b>                                                       | 31  |
| 2   | <b>Neu5Aca2-8Neu5Aca2-8Neu5Acb-Sp8</b>                                                                     | 20  |
